# Supplementary material for: Graphene oxide wrapped hierarchical porous carbon–sulfur composite cathode with enhanced cycling and rate performance for lithium sulfur batteries
Source: Royal Society of Chemistry journal article supplement (doi:10.1039/c4ra12393j), 2014-12-11
Supplement: c4ra12393j1.pdf [file c4ra12393j1.pdf]

## Supplementary Information

### Graphene oxide wrapped hierarchical porous carbon-sulfur composite cathode with enhanced cycling and rate performance for lithium sulfur batteries

Shuangke Liu,<sup>a\*</sup> Kai Xie,<sup>a</sup> Yujie Li,<sup>a</sup> Zhongxue Chen,<sup>ab</sup> Xiaobin Hong,<sup>a</sup> Liangjun Zhou,<sup>a</sup> Junfei Yuan<sup>a</sup> and Chunman Zheng<sup>a\*</sup>

<sup>a</sup> College of Aerospace Science and Engineering, National University of Defense Technology, Changsha, 410073, China.

<sup>b</sup> College of Chemistry and Chemical Engineering, Hunan University, Changsha, 410082, China.

E-mail: liu\_sk@139.com; zhengchunman@hotmail.com

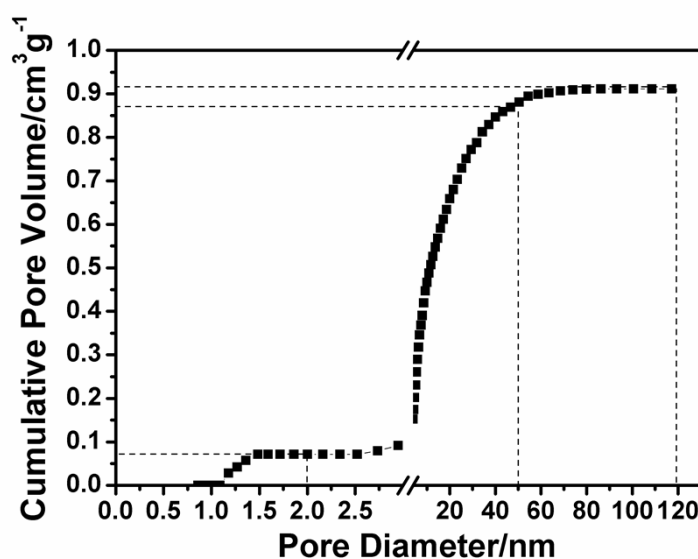

Fig.S1 The plot of cumulative volume vs. pore diameter of the HPC

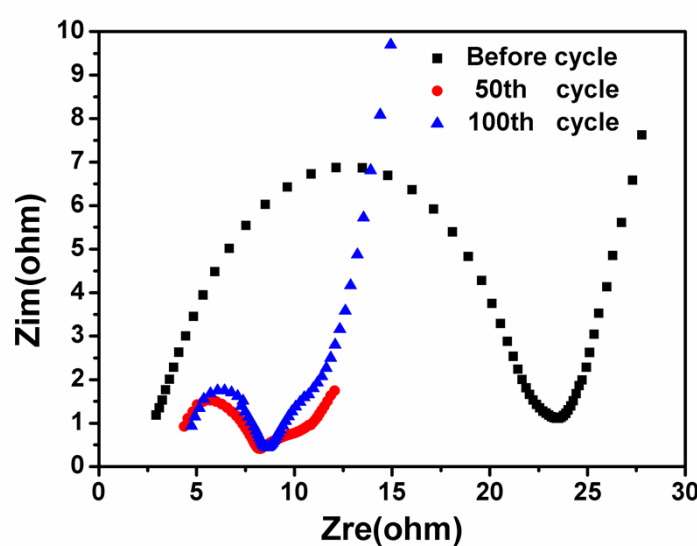

Fig.S2 Electrochemical impedance spectra of the HPC-S@GO electrode before and after 50, 100 cycles

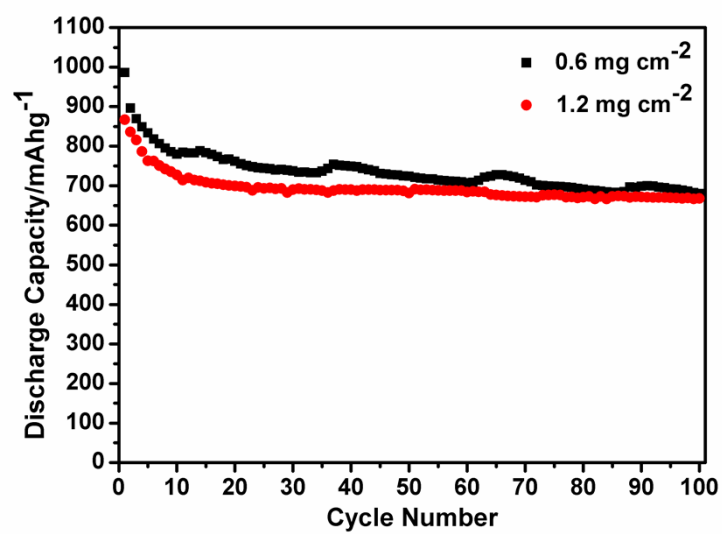

**Fig.S3** The cycling performance of the HPC-S@GO electrode with different sulfur loadings at 1C rate
